# Supplementary material for: Birth and death of gene overlaps in vertebrates
Source: Springer Nature journal article supplement (doi:10.1186/1471-2148-7-193), 2007-01-01
Supplement: 12862_2007_484_MOESM1_ESM.pdf [file 12862_2007_484_MOESM1_ESM.pdf]

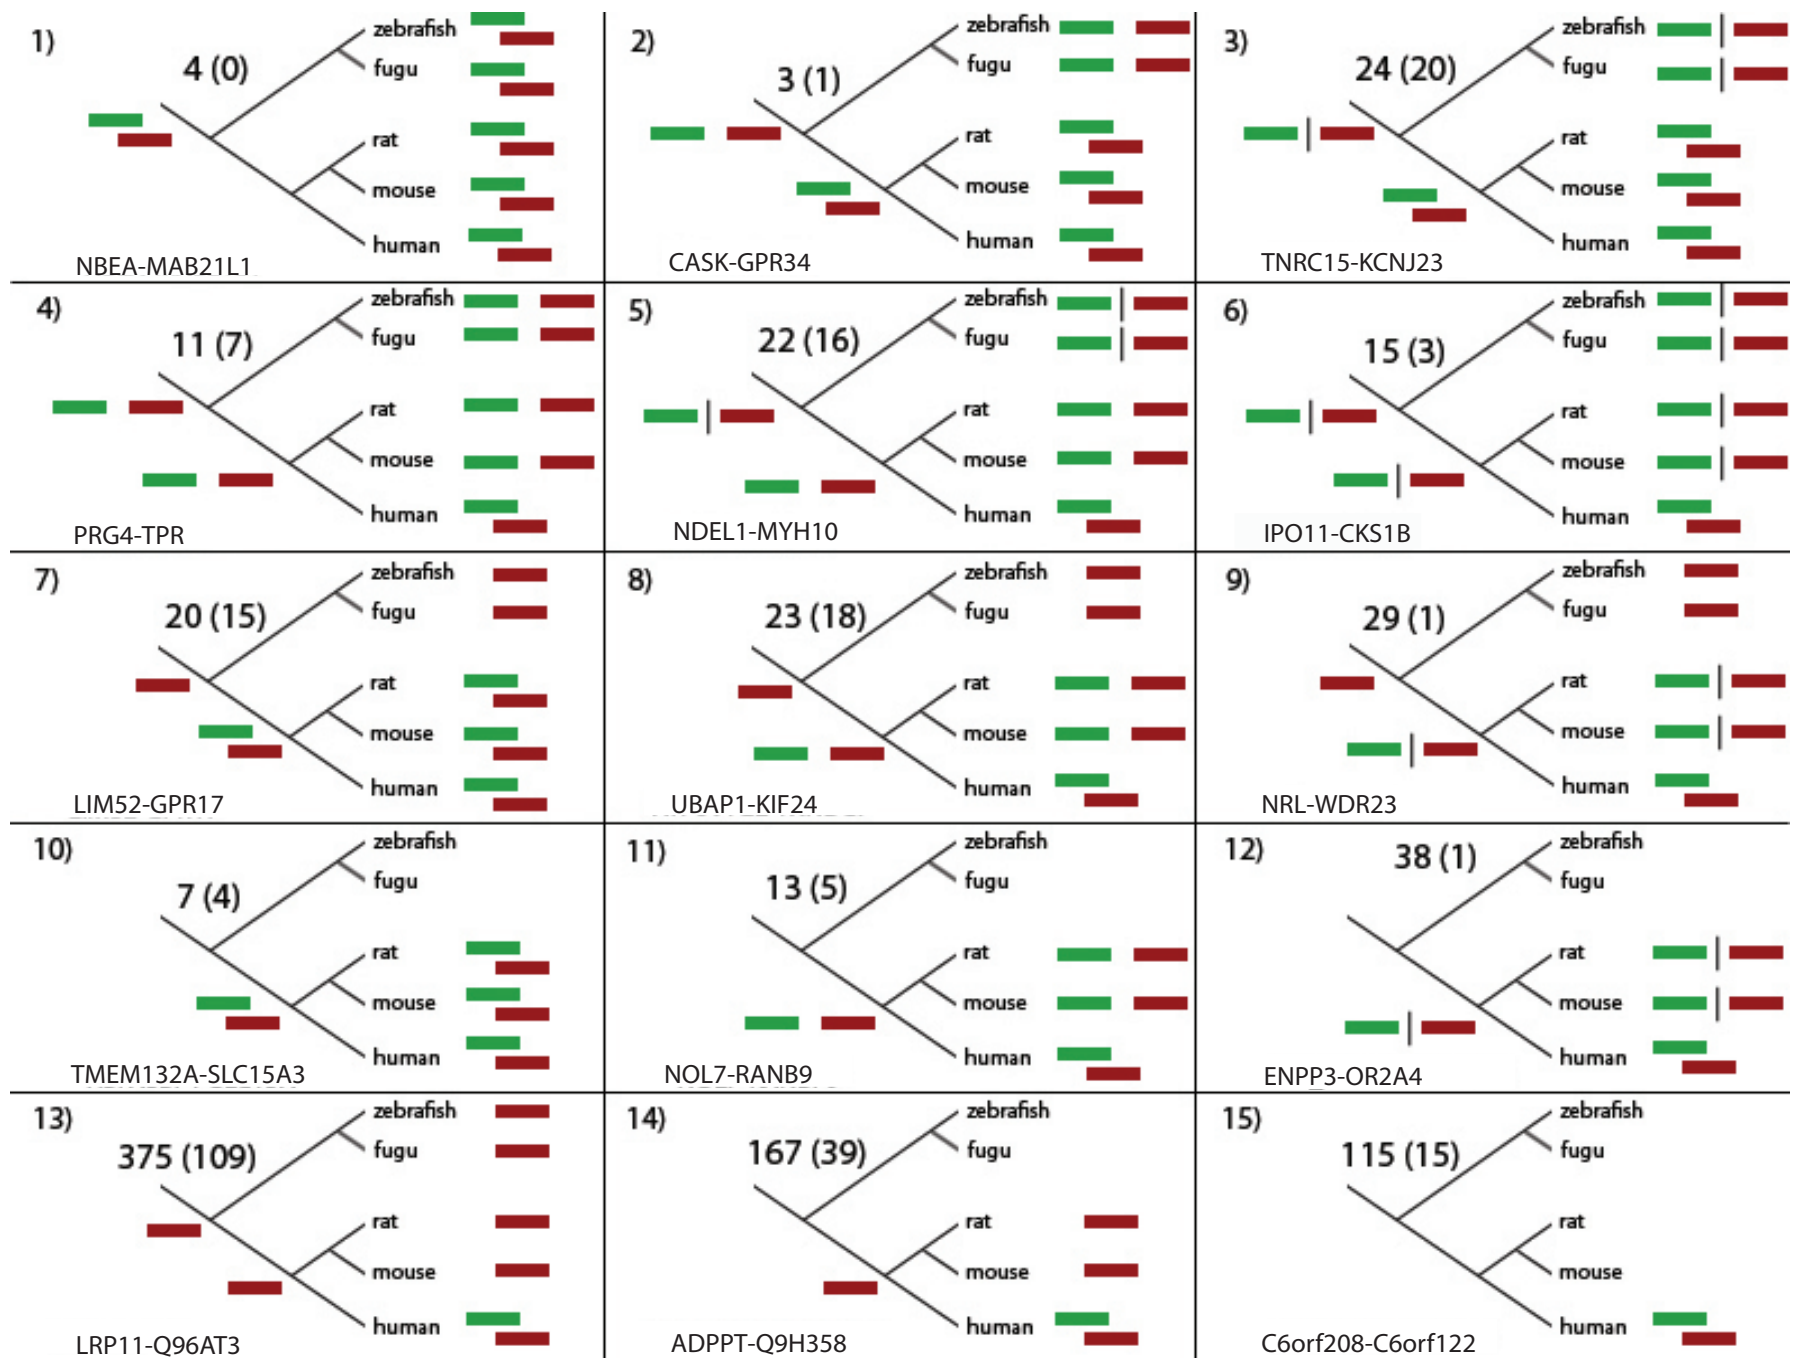

 Genes are overlapping
  Genes are next to each other but not overlapping
  Genes are separated
  Only one from two genes is present
