# Supplementary material for: Birth and death of gene overlaps in vertebrates
Source: Springer Nature journal article supplement (doi:10.1186/1471-2148-7-193), 2007-01-01
Supplement: 12862_2007_484_MOESM5_ESM.pdf [file 12862_2007_484_MOESM5_ESM.pdf]

|            | ..... ..... | ..... ..... | ..... ..... | ..... ..... | ..... ..... | ..... ..... | ..... ..... | ..... ..... | ..... ..... | ..... ..... | ..... ..... |
|------------|-------------|-------------|-------------|-------------|-------------|-------------|-------------|-------------|-------------|-------------|-------------|
|            | 335         | 345         | 355         | 365         | 375         | 385         | 395         | 405         | 415         | 425         | 435         |
| human.1    | FSRSGHTSFF  | DKG-AVNGFD  | PAPPPPGLGS  | SRPSSAPGML  | PLSV        |             |             |             |             |             |             |
| chimp.1    | FSRSGHTSFF  | DKG-AVNGFD  | PAPPPPGLGS  | SRPSSAPGML  | PLSV        |             |             |             |             |             |             |
| mouse.1    | CPRSGRATFF  | HKG-AVNGFD  | PAPPPPGLGS  | SRPSSAPGML  | PLSV        |             |             |             |             |             |             |
| rat.1      | CPRSGRATFF  | HKG-AVNGFD  | PAPPPPGLGS  | SRPSSAPGML  | PLSV        |             |             |             |             |             |             |
| rabbit.1   | FSRSGHTSFF  | DKG-AVNGFD  | PAPPPPGLGS  | SRPLSAPGML  | PLSV        |             |             |             |             |             |             |
| dog.1      | FSRSGHTSFF  | DKG-AVNGFD  | PAPPPPGLGS  | SRPSSAPGML  | PLSV        |             |             |             |             |             |             |
| cow.1      | FSRSGHTSFF  | DKG-AVNGFD  | PAPPPPGLGS  | SRPSSAPGML  | PLSV        |             |             |             |             |             |             |
| chicken.1  | YPHPGHTSFF  | DKG-AVNGFD  | QG--TPGLGA  | SRPSSAPGML  | PLSV        |             |             |             |             |             |             |
| xenopus.1  | YSHAGHTSFF  | DKG-AVNGYD  | ----PPGVLG  | SRPPSPPGML  | PLSV        |             |             |             |             |             |             |
| zebrafish. | FSHSLHTTYF  | DKT-TMNGLD  | PGALSAAIAS  | PRAVSPPGLL  | PLSV        |             |             |             |             |             |             |
| zebrafish. | YSHSLHTSYF  | DKARTVNGLD  | PGDGTHITAP  | PRSNSPSGLV  | -LSV        |             |             |             |             |             |             |
| fugu.1     | FPHALHTAYF  | DKT-TVNGLD  | PGALTAS---  | -RAMSPPGML  | PLSV        |             |             |             |             |             |             |
| human.2    | FSRSGHTSFF  | DKG-----    | -----       | -----       | ----QEKVIF  | PTLFMGQ     |             |             |             |             |             |
| chimp.2    | FSRSGHTSFF  | DKG-----    | -----       | -----       | ----QEKVIF  | PTLFMGQ     |             |             |             |             |             |
| mouse.2    | CPRSGRATFF  | HKG-----    | -----       | -----       | ----QEKVIF  | PTLFMGQ     |             |             |             |             |             |
| dog.2      | FSRSGHTSFF  | DKG-----    | -----       | -----       | ----QEKVIF  | PTLFMGQ     |             |             |             |             |             |
| cow.2      | FSRSGHTSFF  | DKG-----    | -----       | -----       | ----QEKVIF  | PTLFMGQ     |             |             |             |             |             |
| Xenopus.2  | YSHAGHTSFF  | DKG-----    | -----       | -----       | ----QEKVIF  | PTLFMG      |             |             |             |             |             |
| human.3    | FSRSGHTSFF  | DKG-----    | -----       | -----       | -----       | -----SSS    | SCAIRASRRR  | FSSSSADLAG  | RGG-GDGSIP  | AQHSTGASGK  | APPPTLLLET  |
| chimp.3    | FSRSGHTSFF  | DKG-----    | -----       | -----       | -----       | -----SSS    | SCAIRASRRR  | FSSSSADLAG  | RGG-GDGSIP  | AQHSTGASGK  | APPPTLLLET  |
| dog.3      | FSRSGHTSFF  | DKG-----    | -----       | -----       | -----       | -----SSS    | SCAIRASRRR  | FSSSSADLAG  | AGREGDGSTP  | -----       | -----       |
| Xenopus.3  | YSHAGHTSFF  | DKG-----    | -----       | -----       | -----       | -----SSS    | NWAILASRRL  | FSSRRADL--  | -----       | -----       | -----       |
| Xenopus.4  | YSHAGHTSFF  | DKG         |             |             |             |             |             |             |             |             |             |
| ciona      | TPHEGSTTDS  | SKN-----    | -----       | -----       | -----       | -----SS-    | -VKIRV      |             |             |             |             |
