# Supplementary figures and images for: Birth and death of gene overlaps in vertebrates
Source: Springer Nature journal article supplement (doi:10.1186/1471-2148-7-193), 2007-01-01

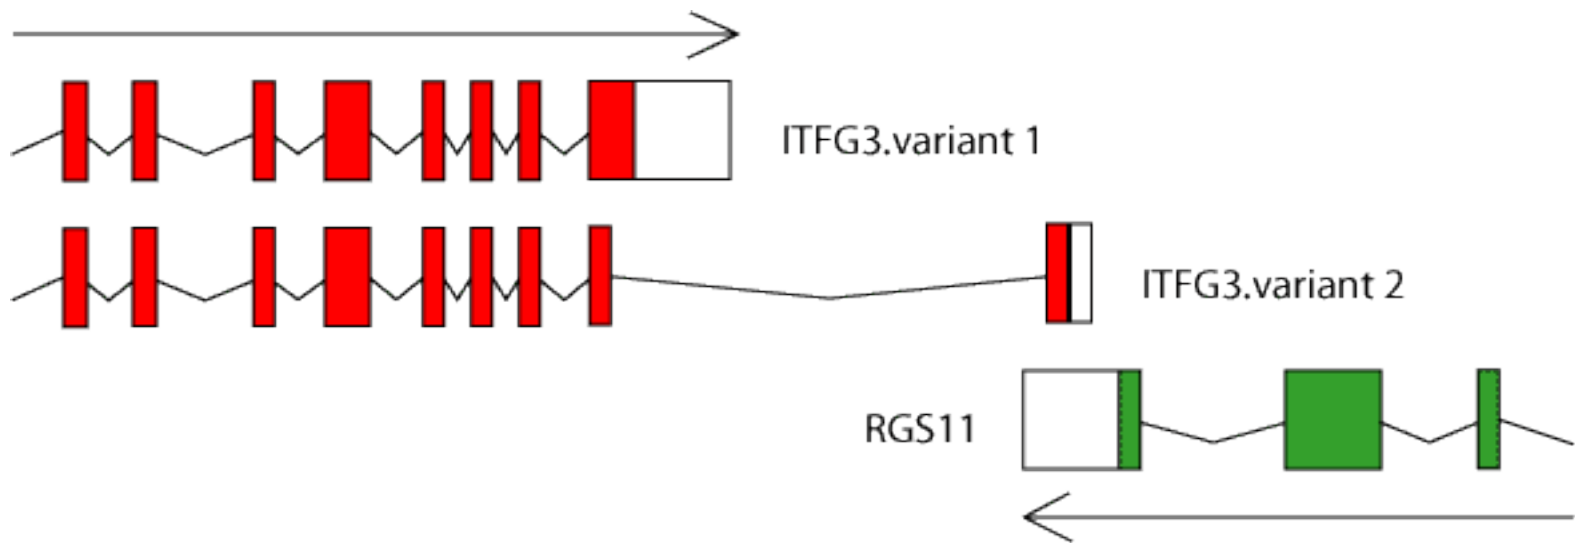

Supplement: 12862_2007_484_MOESM2_ESM.pdf [file 12862_2007_484_MOESM2_ESM.pdf]

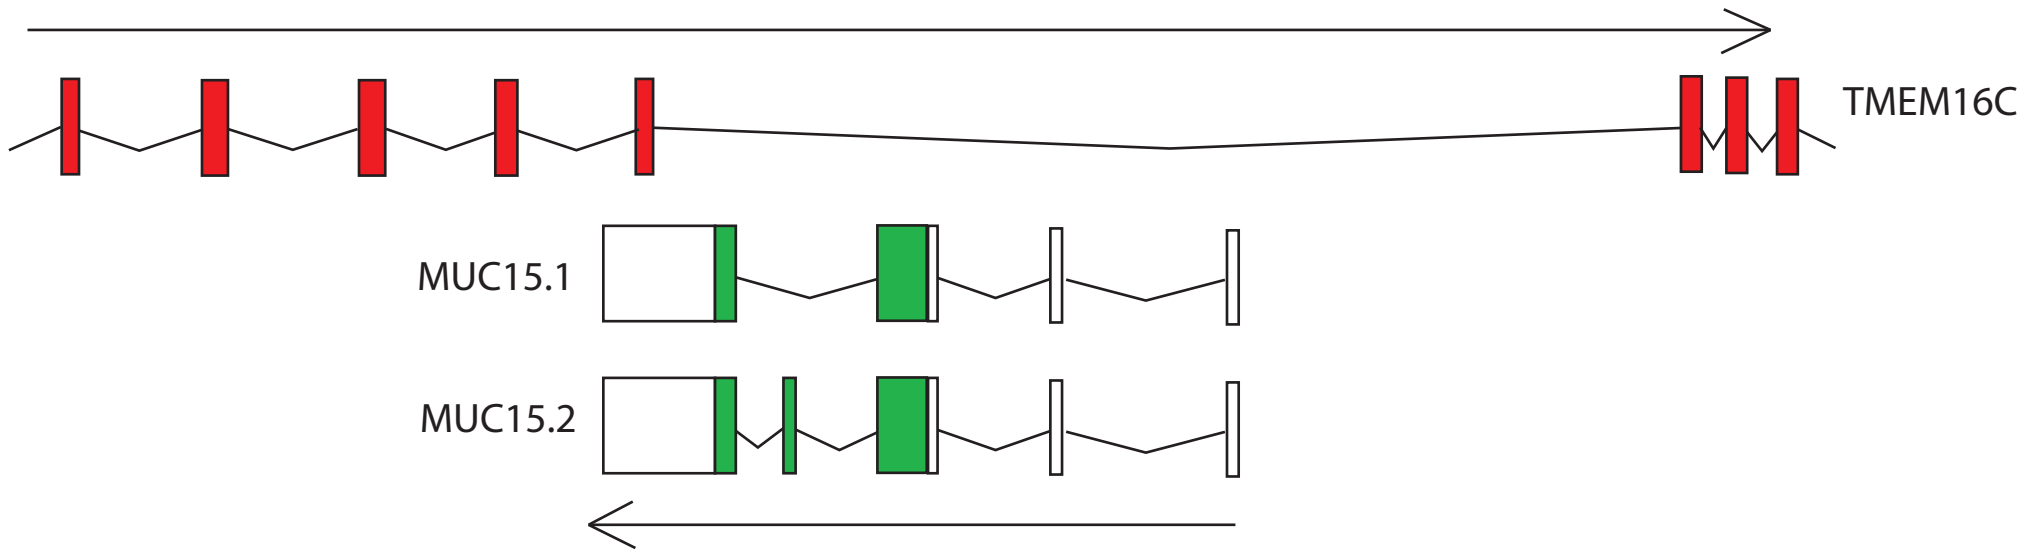

Supplement: 12862_2007_484_MOESM3_ESM.pdf [file 12862_2007_484_MOESM3_ESM.pdf]

Human

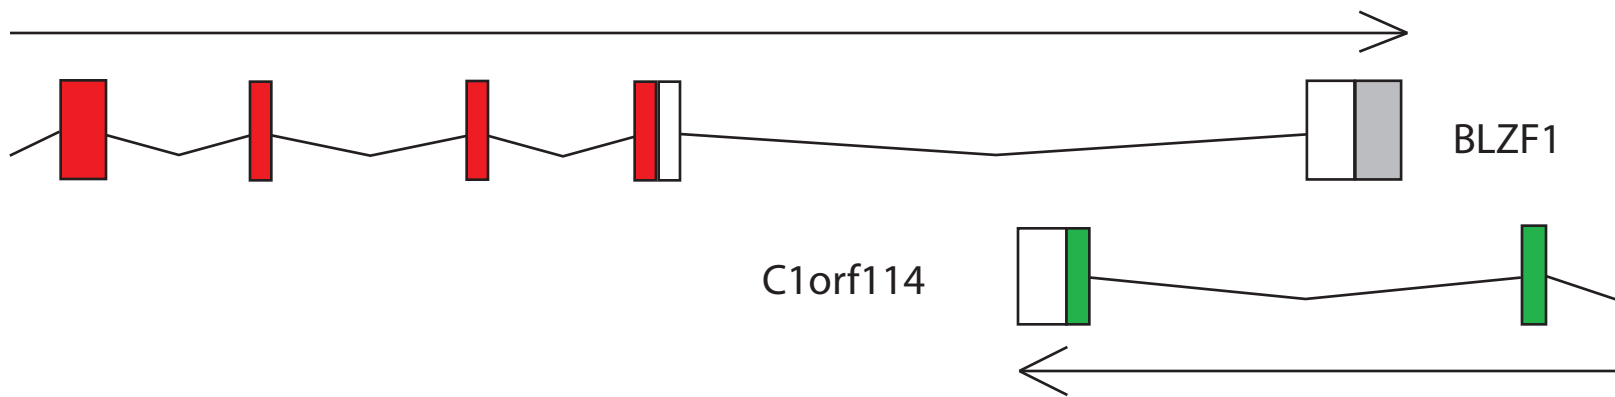

Mouse

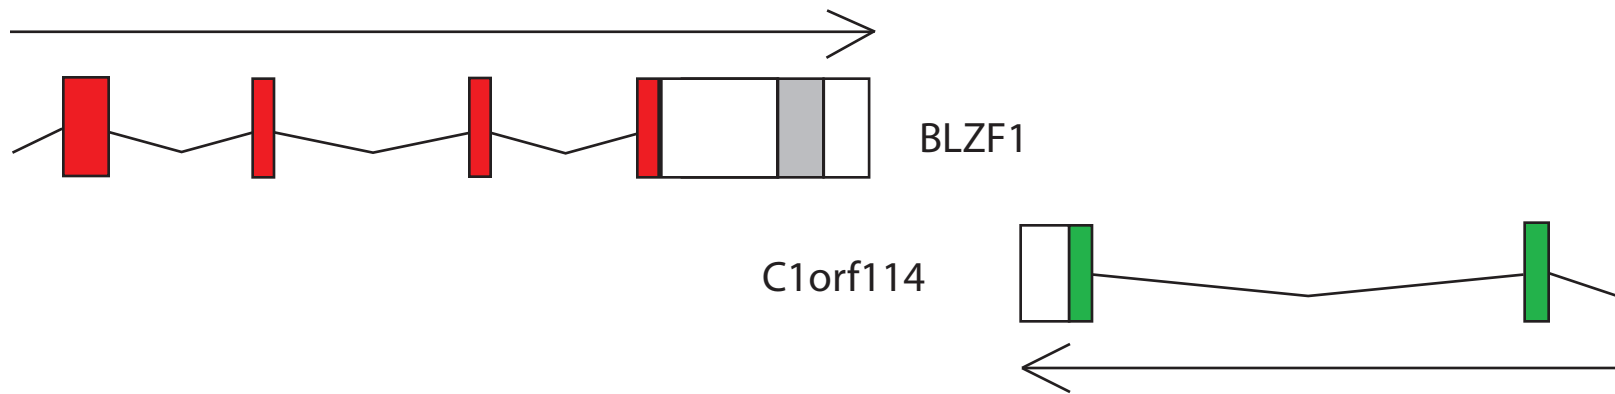

Supplement: 12862_2007_484_MOESM4_ESM.pdf [file 12862_2007_484_MOESM4_ESM.pdf]

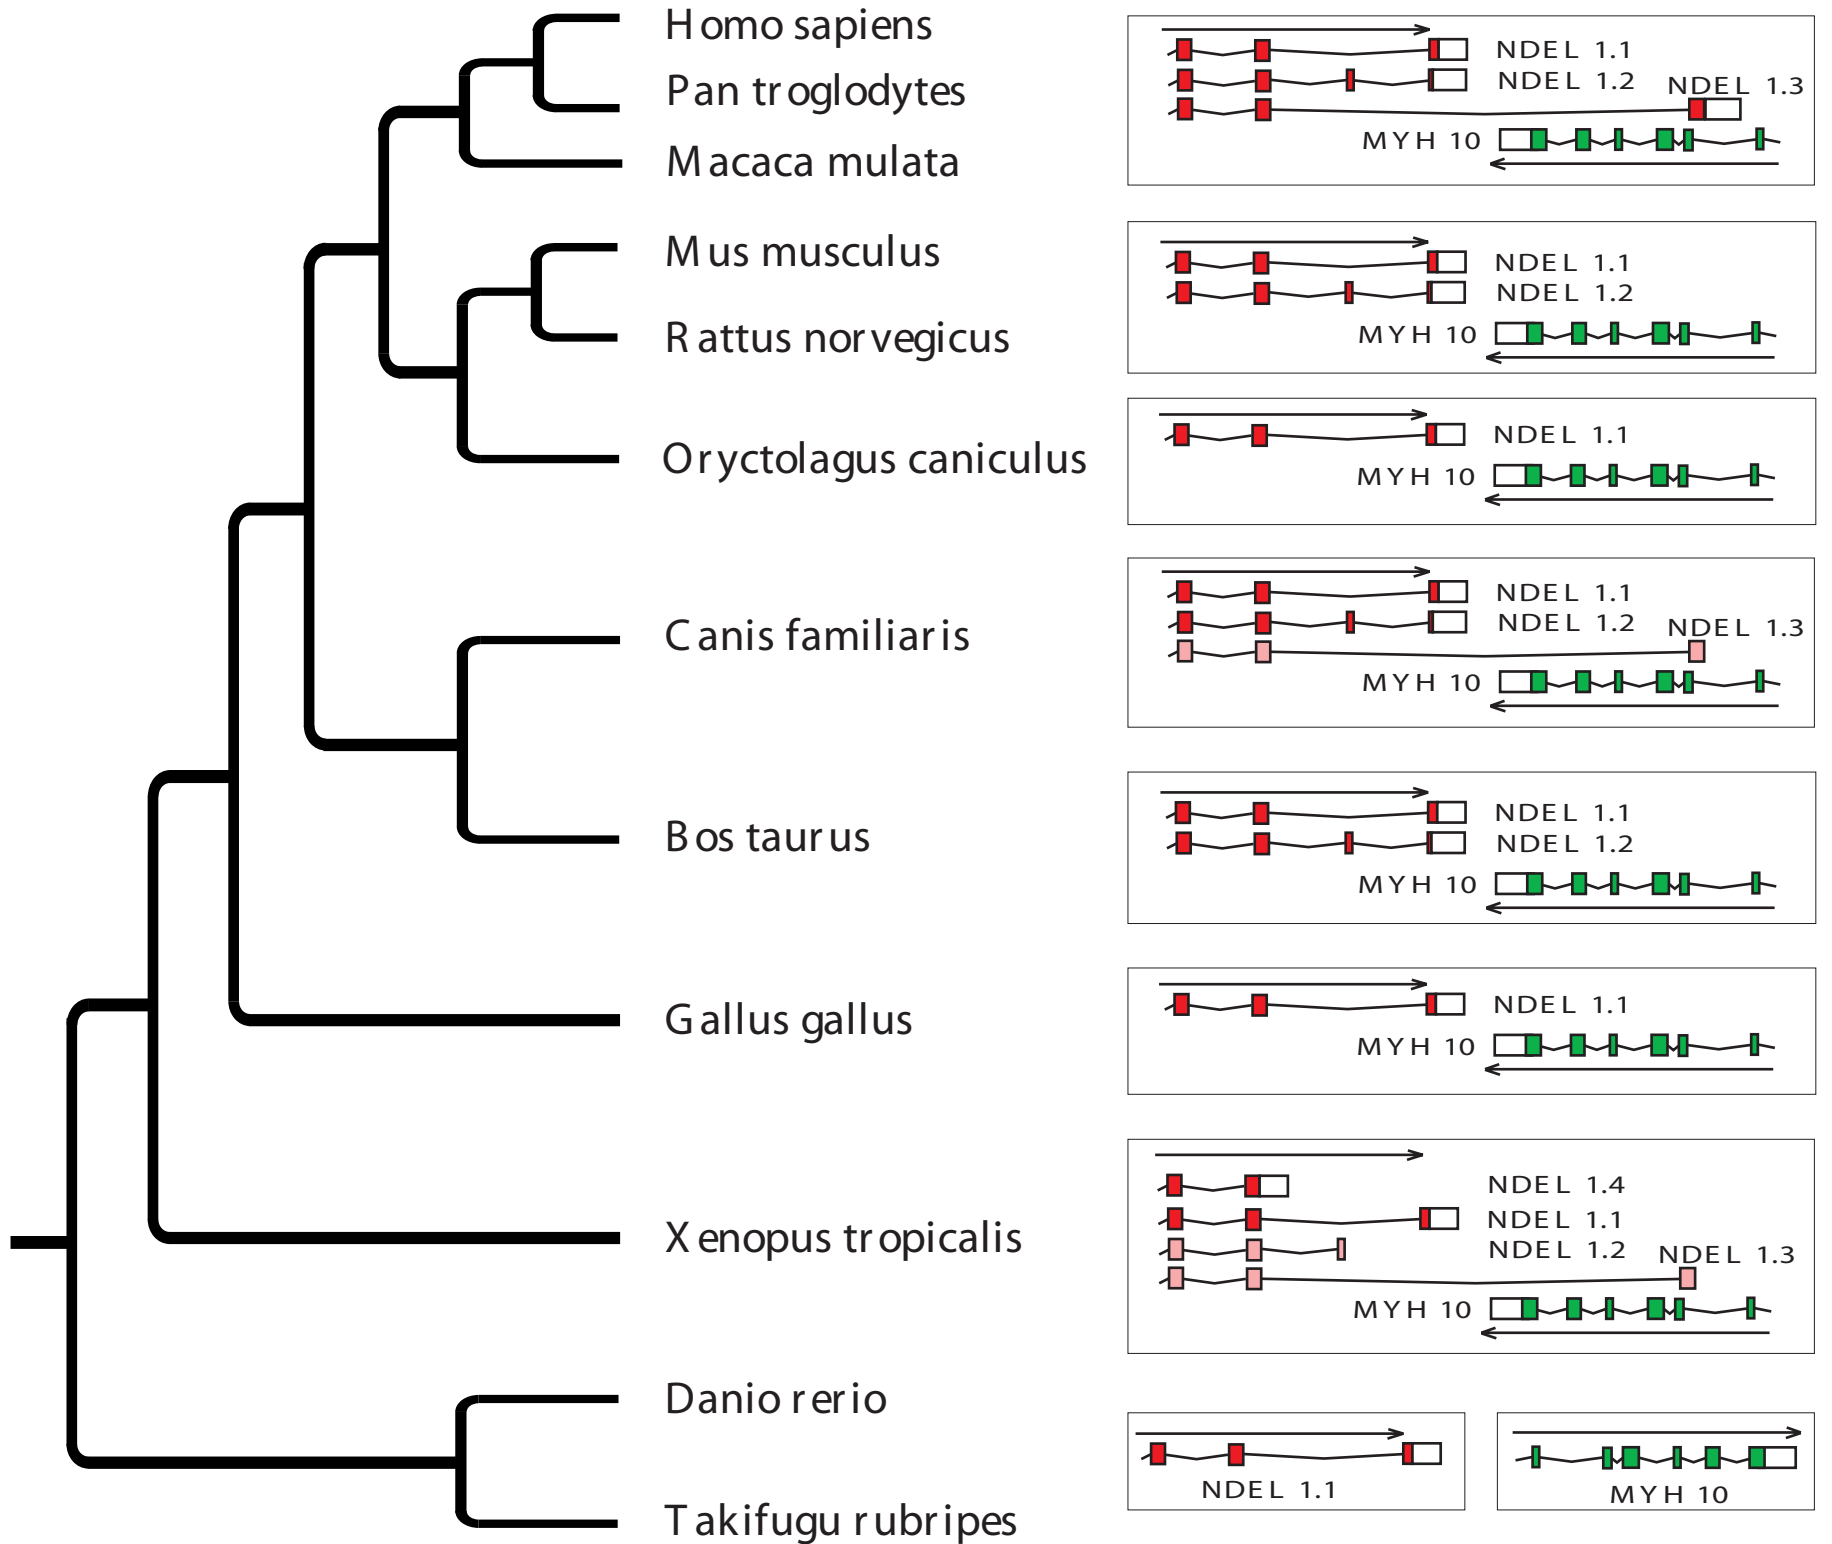

Supplement: 12862_2007_484_MOESM6_ESM.pdf [file 12862_2007_484_MOESM6_ESM.pdf]

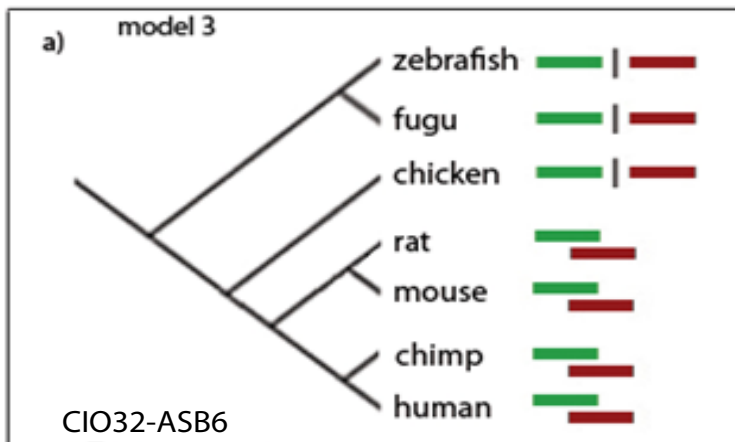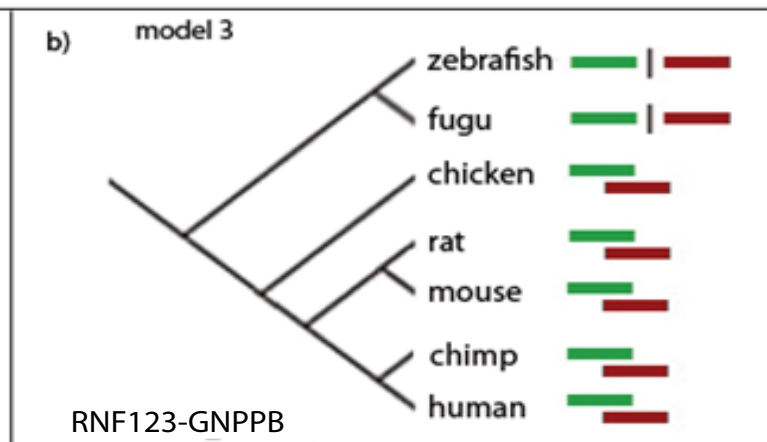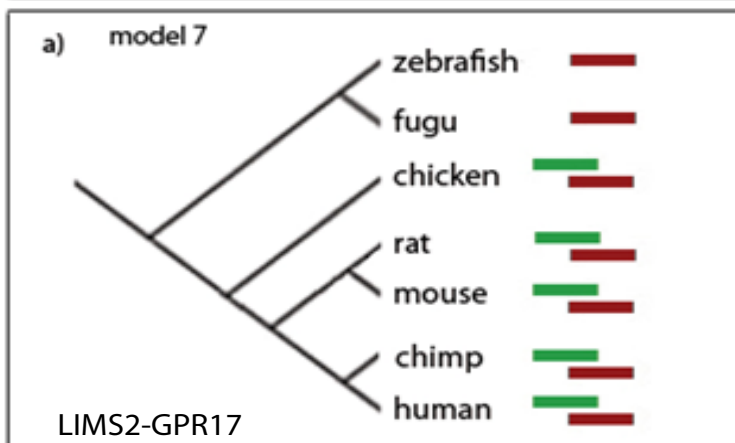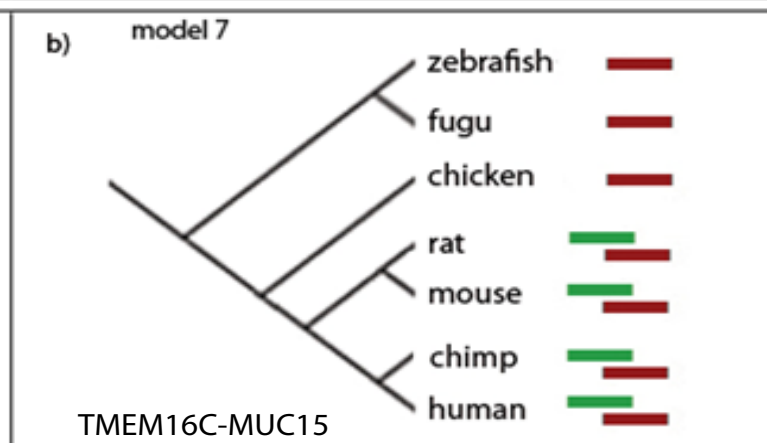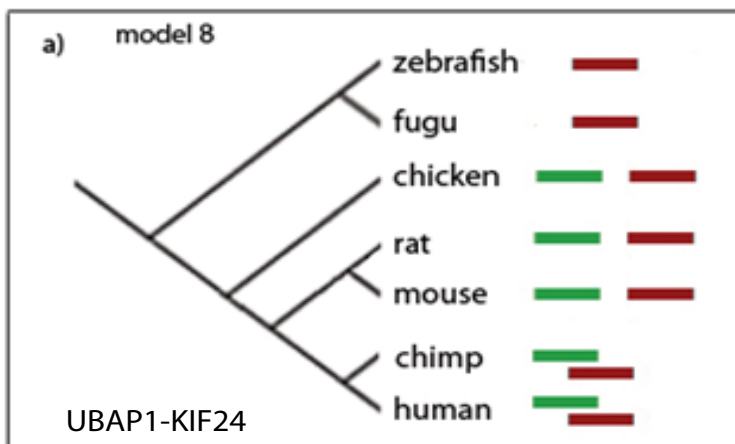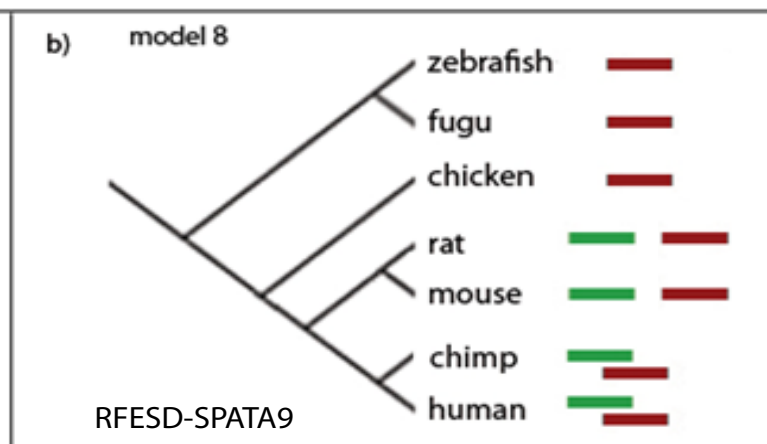

Supplement: 12862_2007_484_MOESM7_ESM.pdf [file 12862_2007_484_MOESM7_ESM.pdf]
